# Supplementary material for: System Analysis of ROS‐Related Genes in the Prognosis, Immune Infiltration, and Drug Sensitivity in Hepatocellular Carcinoma
Source: Hindawi journal article supplement (doi:10.1155/2021/6485871), 2021-01-01

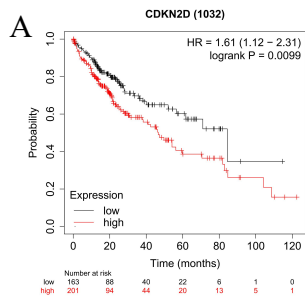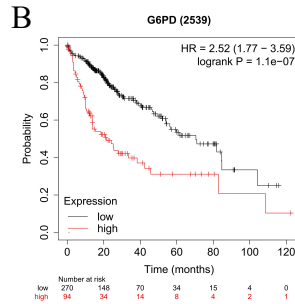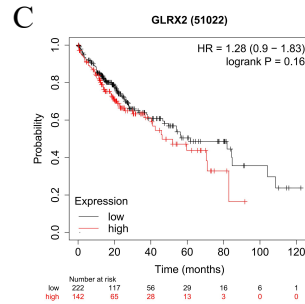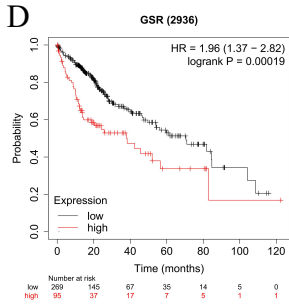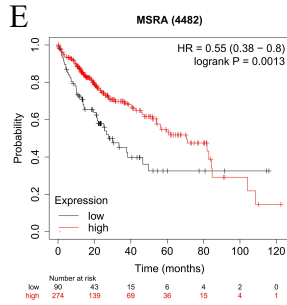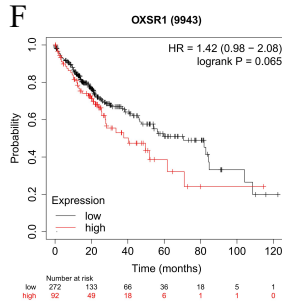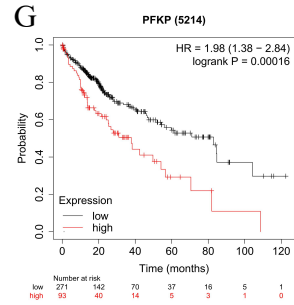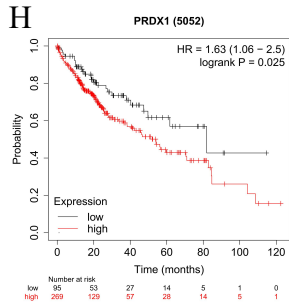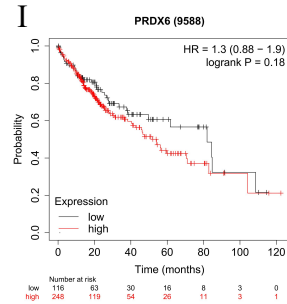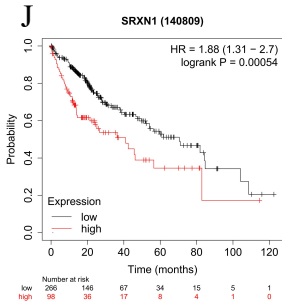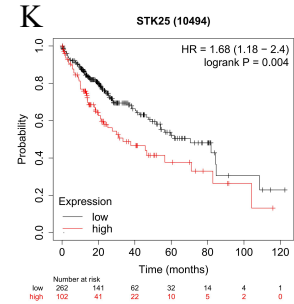

Supplement: f2 [file 6485871.f2.pdf]
