# Supplementary material for: System Analysis of ROS-Related Genes in the Prognosis, Immune Infiltration, and Drug Sensitivity in Hepatocellular Carcinoma
Source: Oxid Med Cell Longev. 2021 Nov 8;2021:6485871. doi: 10.1155/2021/6485871 (PMC8593590; doi:10.1155/2021/6485871)
Supplement: Supplementary 3 — Table S1: the list of 49 ROS-related genes. [file 6485871.f3.txt]

ABCC1
ATOX1
CAT
CDKN2D
EGLN2
ERCC2
FES
FTL
G6PD
GCLC
GCLM
GLRX
GLRX2
GPX3
GPX4
GSR
HBXIP
HHEX
HMOX2
IPCEF1
JUNB
LSP1
MBP
MGST1
MPO
MSRA
NDUFA6
NDUFB4
NDUFS2
NQO1
OXSR1
PDLIM1
PFKP
PPP2R4
PRDX1
PRDX2
PRDX4
PRDX6
PRNP
SBNO2
SCAF4
SELS
SOD1
SOD2
SRXN1
STK25
TXN
TXNRD1
TXNRD2
