# Supplementary material for: System Analysis of ROS-Related Genes in the Prognosis, Immune Infiltration, and Drug Sensitivity in Hepatocellular Carcinoma
Source: Oxid Med Cell Longev. 2021 Nov 8;2021:6485871. doi: 10.1155/2021/6485871 (PMC8593590; doi:10.1155/2021/6485871)
Supplement: Supplementary 4 — Table S2: the list of 38 immune checkpoint genes. [file 6485871.f4.txt]

Gene	Coef
CDKN2D	0.088497369
G6PD	0.142088403
GLRX2	0.177260522
GSR	0.020102988
MSRA	-0.075191301
OXSR1	0.211543379
PFKP	0.066129886
PRDX1	0.049125965
PRDX6	0.209931945
SRXN1	0.175450919
STK25	0.241559408
